# Supplementary material for: High- k organic–inorganic hybrid dielectric material for flexible thin-film transistors and printed logic circuits
Source: Royal Society of Chemistry journal article supplement (doi:10.1039/d4mh01249f), 2025-01-01
Supplement: d4mh01249f1.pdf [file d4mh01249f1.pdf]

1 **Supplementary Material for**

2 **High-k Organic-Inorganic Hybrid Dielectric material for Flexible**

3 **Thin-Film Transistors and Printed Logic Circuits**

4 Rixuan Wang<sup>1†</sup>, Hong Nhung Le<sup>2†</sup>, Cheolmin Jung<sup>1†</sup>, Hyeok-jin Kwon<sup>3</sup>, Zhijun Li<sup>4</sup>, Hyungdo

5 Kim<sup>5</sup>, Zhi Hong Zhang<sup>6\*</sup>, Juyoung Kim<sup>2\*</sup>, Se Hyun Kim<sup>1\*</sup>, Xiaowu Tang<sup>6\*</sup>

6 <sup>1</sup>Division of Chemical Engineering, Konkuk University, Seoul 05029, Republic of Korea.

7 <sup>2</sup>Department of Advanced Materials Engineering, Kangwon National University, Samcheok

8 25931, Republic of Korea.

9 <sup>3</sup>Department of Industrial Chemistry, Pukyung National University, Busan 48513, Republic of

10 Korea.

11 <sup>4</sup>Hangzhou Institute for Advanced Study, University of Chinese Academy of Sciences, No.1

12 Xiangshanzhi Lane, Hangzhou 310024, China.

13 <sup>5</sup>Graduate School of Engineering, Department of Polymer Chemistry, Kyoto University,

14 Katsura, Nishikyo-ku, Kyoto 615-8510, Japan

15 <sup>6</sup>College of Material and Chemical Engineering, Zhengzhou University of Light Industry,

16 Zhengzhou, Henan 450002, China.

17

18 \* Corresponding author. E-mail: [2006025@zzuli.edu.cn](mailto:2006025@zzuli.edu.cn) (Z. Zhang) ,

19 [juyoungk@kangwon.ac.kr](mailto:juyoungk@kangwon.ac.kr) (J. Kim) , [shkim97@konkuk.ac.kr](mailto:shkim97@konkuk.ac.kr) (S. H. Kim) ,

20 [xwtang@zzuli.edu.cn](mailto:xwtang@zzuli.edu.cn) (X. Tang)

21

22

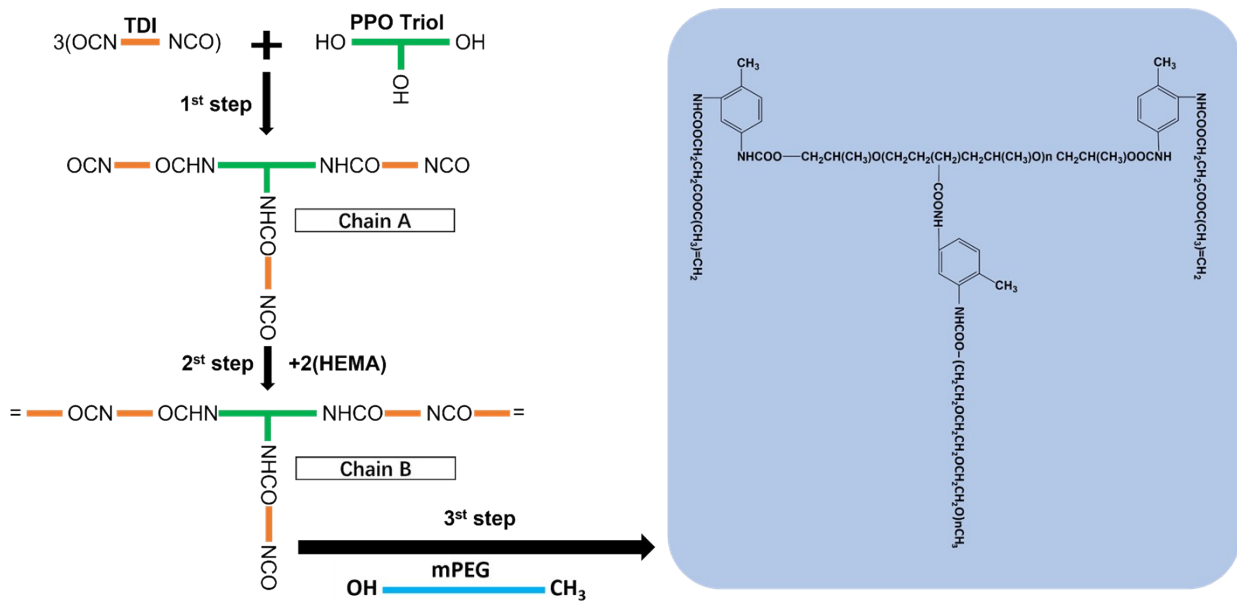

**Fig. S1.** The chemical structure and synthesis pathway of AUP

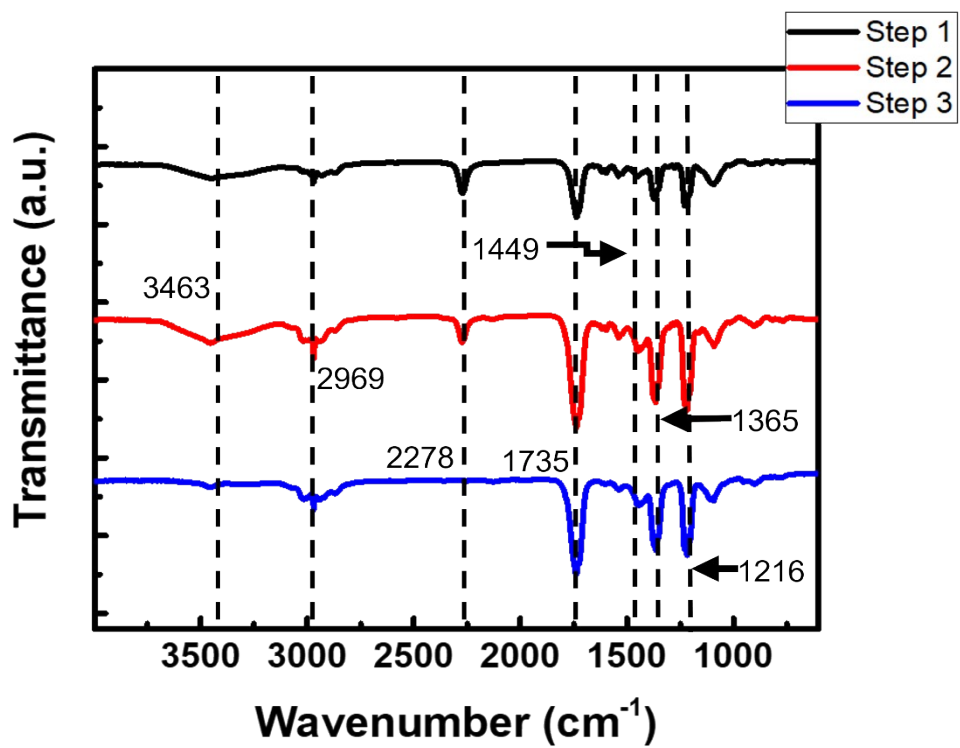

1

2 **Fig. S2.** FTIR spectra of the three steps in the synthesis process of AUP component in O-I

3 hybrid solution.

4

# AUP@SiOx

|                         | Size (d.nm):  | % Intensity: | St Dev (d.nm): |
|-------------------------|---------------|--------------|----------------|
| Z-Average (d.nm): 8.530 | Peak 1: 10.05 | 91.9         | 5.842          |
| Pdi: 0.311              | Peak 2: 3835  | 6.0          | 1153           |
| Intercept: 0.659        | Peak 3: 305.6 | 2.2          | 126.4          |

Result quality : Good

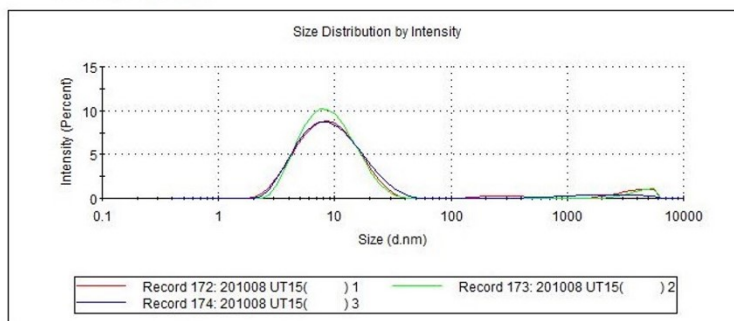

# AUP@SiOx-184

|                         | Size (d.nm):  | % Intensity: | St Dev (d.nm): |
|-------------------------|---------------|--------------|----------------|
| Z-Average (d.nm): 17.03 | Peak 1: 23.30 | 95.0         | 11.29          |
| Pdi: 0.232              | Peak 2: 3.933 | 5.0          | 0.9105         |
| Intercept: 0.858        | Peak 3: 0.000 | 0.0          | 0.000          |

Result quality : Good

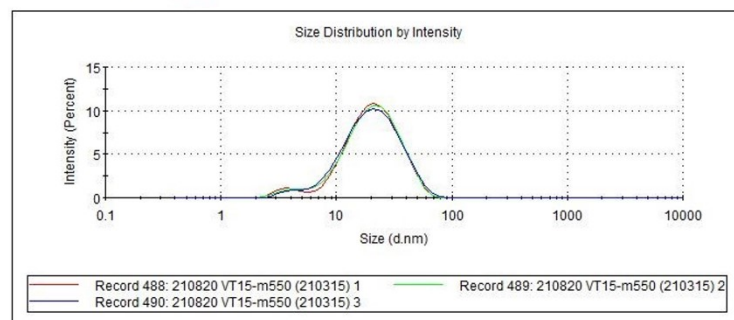

1

2 Fig. S3. The DLS about AUP@SiOx and AUP@SiOx-184.

3

4

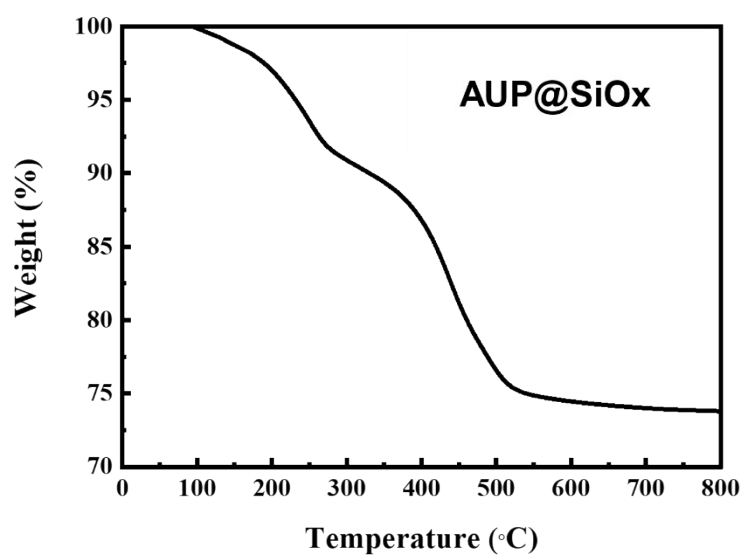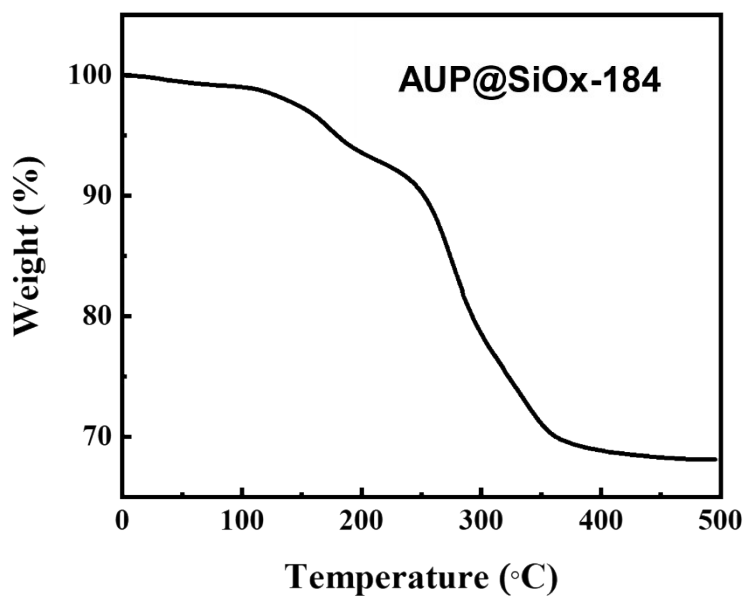

1

2 **Fig S4.** TGA data for the AUP@SiOx and AUP@SiOx-184 solutions.

3

4

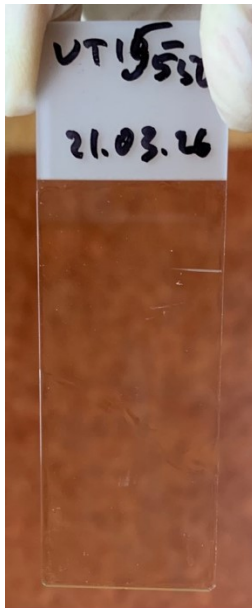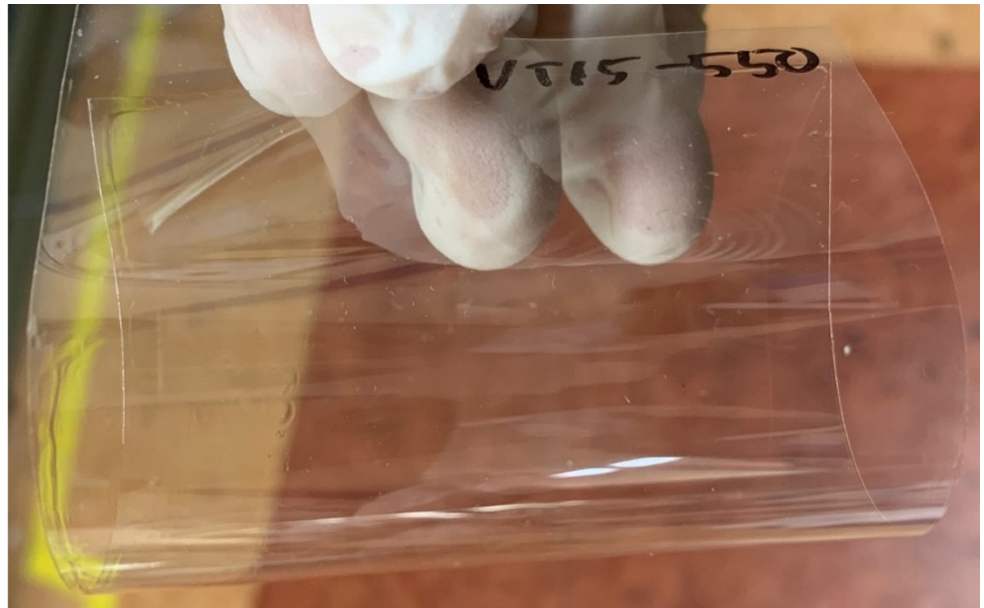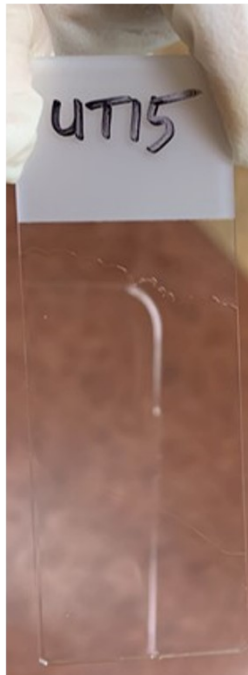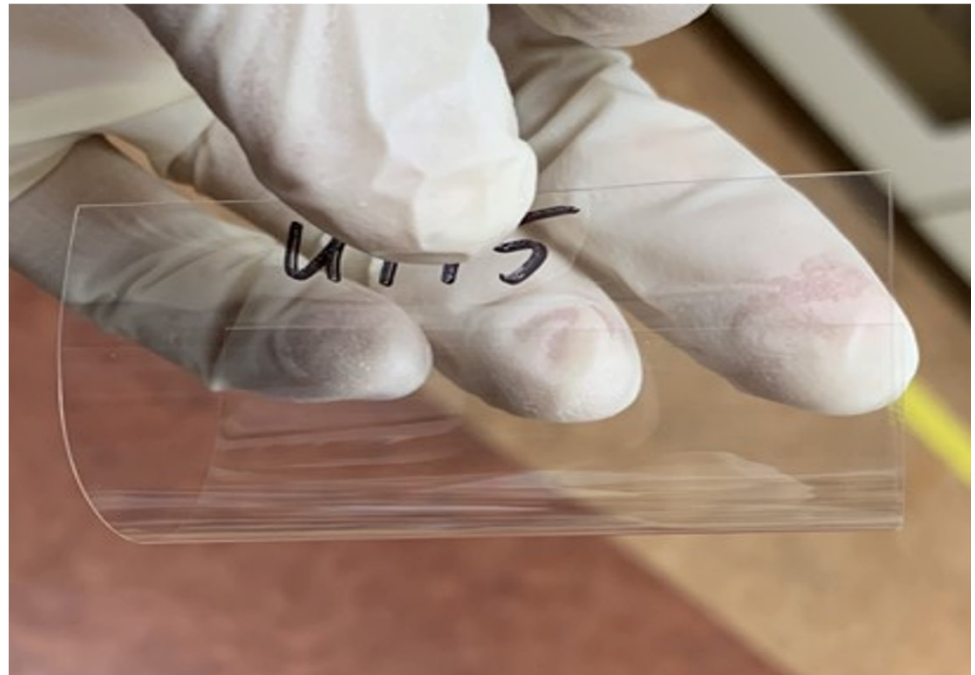

1

2 **Fig S5.** Coating tests of AUP@SiOx-184 and AUP@SiOx solutions on glass and PET  
3 substrates, respectively.

4

5

1 **Table S1.** Hardness testing after coating and curing of AUP@SiO<sub>x</sub>-184 and AUP@SiO<sub>x</sub>  
2 solutions on glass and PET substrates, respectively.

| <b>O-I hybrid coating film</b> | <b>Pencil hardness<br/>on glass slide (H)</b> | <b>Pencil hardness<br/>on PET film (H)</b> |
|--------------------------------|-----------------------------------------------|--------------------------------------------|
| AUP@SiO <sub>x</sub>           | 7                                             | 3                                          |
| AUP@SiO <sub>x</sub> -184      | 7                                             | 4                                          |

3

4

### MALDI-TOF-MS analysis of AUP@SiOx O-I hybrid Solutions

- The range of Mw: 1035.53 – 1690.17g/mol
- The average Mw: 1079.56 g/mol

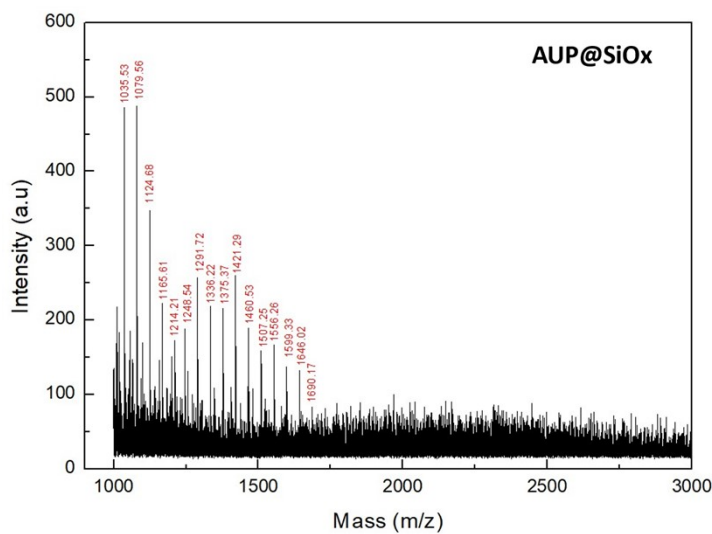

### MALDI-TOF-MS analysis of AUP@SiOx-184 O-I hybrid Solutions

- The range of Mw: 942.97 – 2026.14g/mol
- The average Mw: 1492.94 g/mol

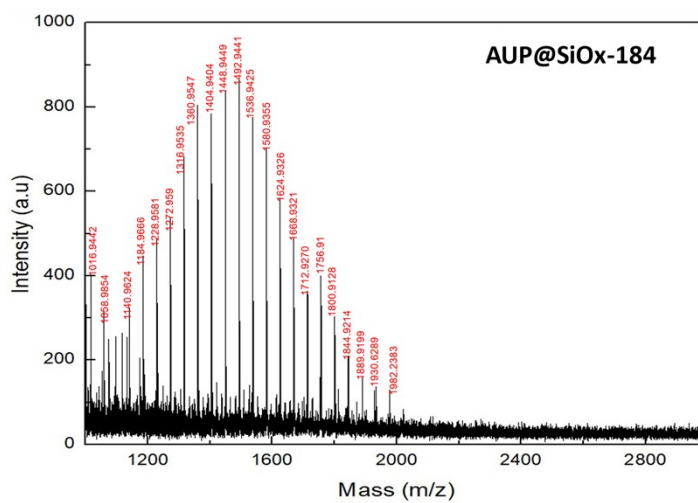

1

2 **Fig S6.** The molecular weight range of AUP@SiOx and AUP@SiOx-184.



<sup>29</sup>Si – NMR analysis of AUP@SiOx O-I hybrid solution

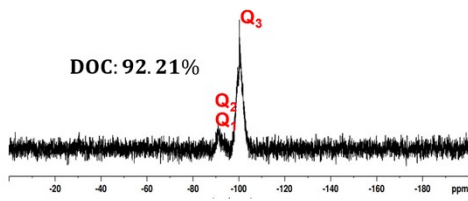

- ❖ Q<sup>m</sup> denote the silicon from tetrafunctional alkoxyasilanes .
- ❖ Q<sup>2</sup> indicates two linkages (linear groups).
- ❖ Q<sup>3</sup> indicates three linkages

<sup>29</sup>Si – NMR analysis of AUP@SiOx-184 O-I hybrid solution

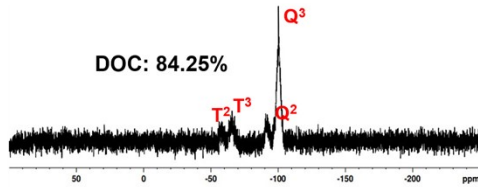

- ❖ T<sup>n</sup> and Q<sup>m</sup> denote the silicon from trifunctional alkoxyasilanes and tetrafunctional alkoxyasilanes, respectively.
- ❖ T<sup>2</sup> illustrates the middle groups of chains or cycles.
- ❖ T<sup>3</sup> shows fully branched sites.
- ❖ Q<sup>2</sup> indicates two linkages (linear groups).
- ❖ Q<sup>3</sup> indicates three linkages

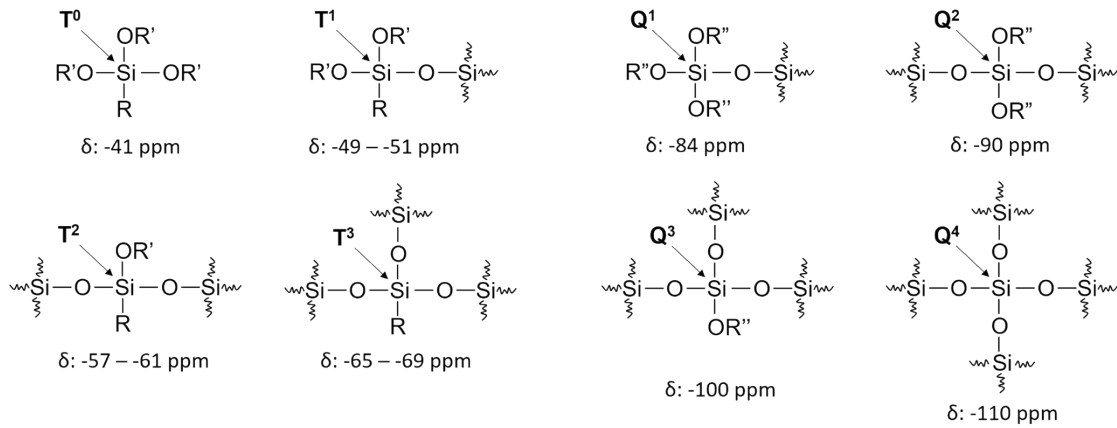

$$\text{DOC} = \frac{Q^1 + 2Q^2 + 3Q^3 + T^1 + 2T^2 + 3T^3}{3 * (Q^1 + Q^2 + Q^3 + T^1 + T^2 + T^3)} \times 100\%$$

1

2 **Fig S7.** <sup>29</sup>Si-NMR spectrum of AUP@SiOx and AUP@SiOx-184.

3

4

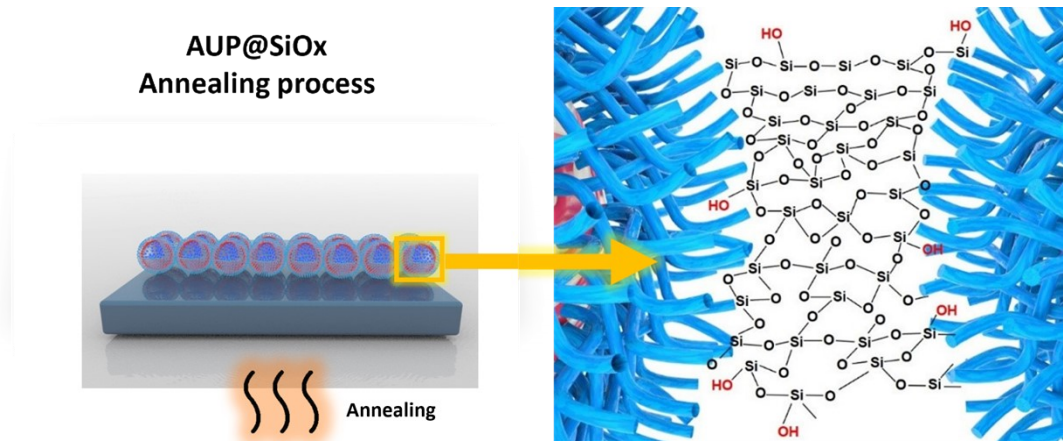

1

2 **Fig S8.** Schematic diagram of the film fabrication mechanism using a uniform AUP@SiO<sub>x</sub> sol-  
3 gel.

4

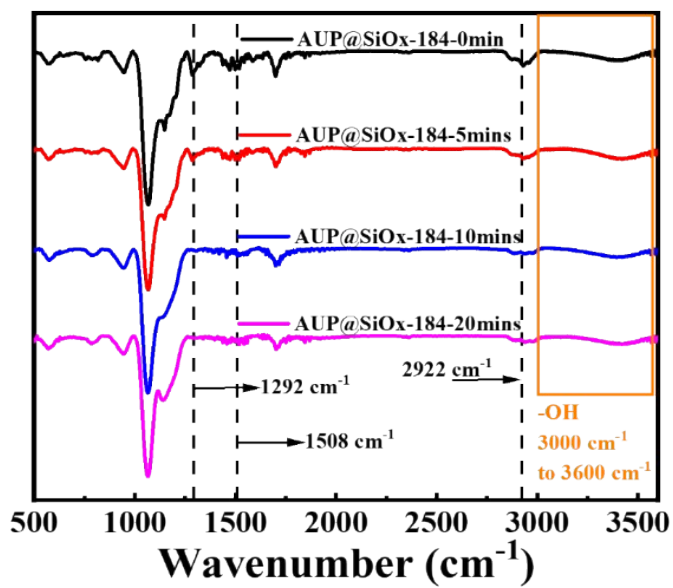

5

6 **Fig. S9** FTIR spectra of AUP@SiO<sub>x</sub> films cured under different Annealing temperature.

7

8

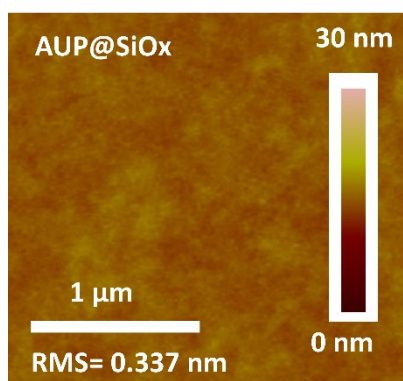

1

2 **Figure S10.** AFM image of AUP @SiOx.

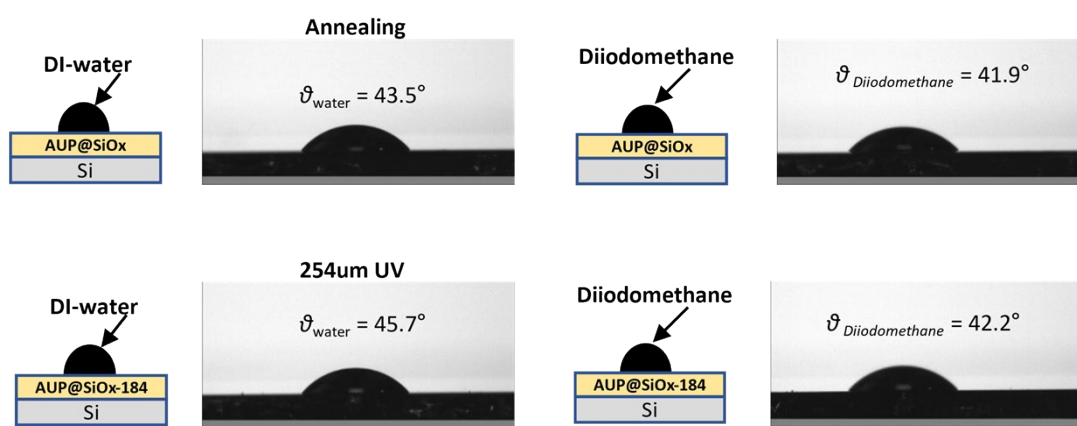

3

4 **Fig. S11.** Contact angle of the dielectric layer after curing of AUP@SiOx and AUP@SiOx-

5 184.

6

7 **Table S2.** The surface tension of the two dielectric layers

| Dielectric type | Contact Angle [°] |               | $\gamma_s^p$          | $\gamma_s^d$          | $\gamma_s$            |
|-----------------|-------------------|---------------|-----------------------|-----------------------|-----------------------|
|                 | Water             | Diiodomethane | [mJ m <sup>-2</sup> ] | [mJ m <sup>-2</sup> ] | [mJ m <sup>-2</sup> ] |
| AUP@SiOx        | 43.5              | 41.8          | 28.6                  | 27.0                  | 55.6                  |
| AUP@SiOx-184    | 45.7              | 42.2          | 27.0                  | 27.2                  | 54.2                  |

8

9

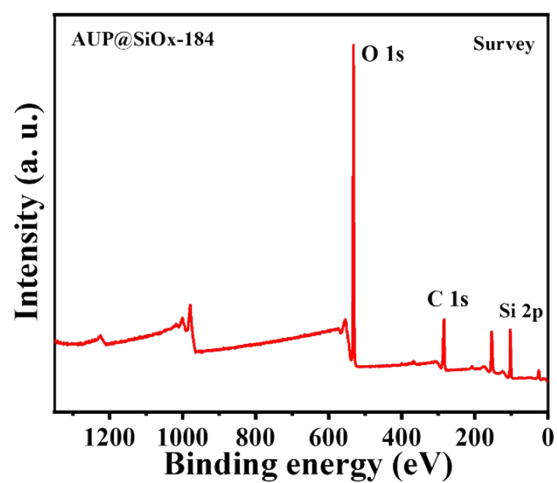

1

2 **Fig S12.** AUP@SiOx-184 full scan XPS spectra.

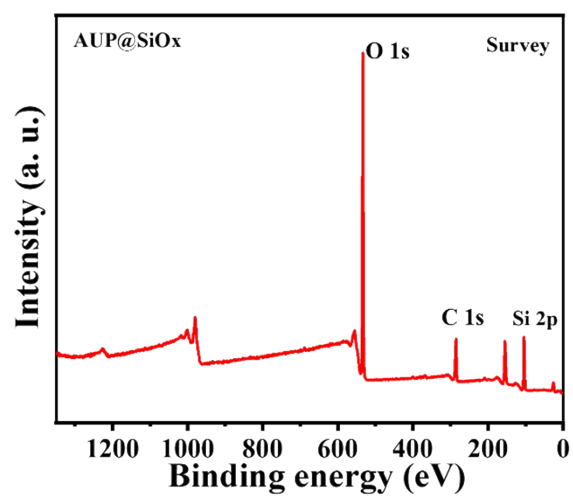

3

4 **Fig S13.** AUP@SiOx full scan XPS spectra.

5

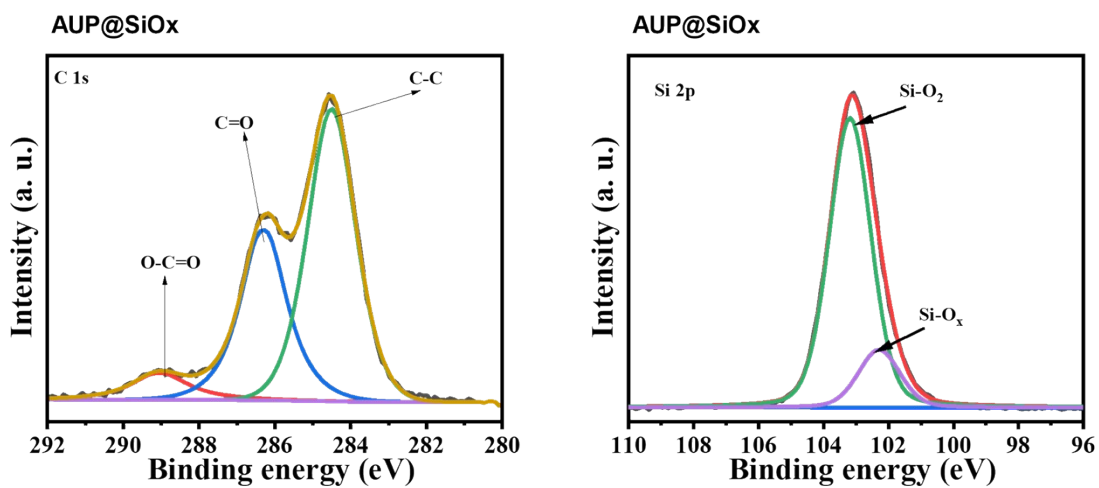

1

2 **Fig S14.** AUP@SiOx-184 C 1s and Si 2p XPS spectra.

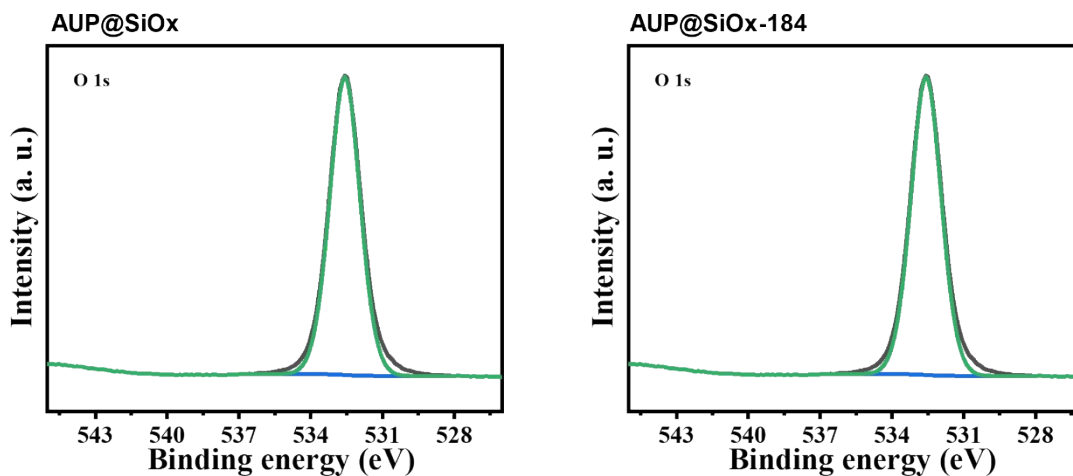

3

4 **Fig S15.** AUP@SiOx and AUP@SiOx-184 O 1s XPS spectra.

5

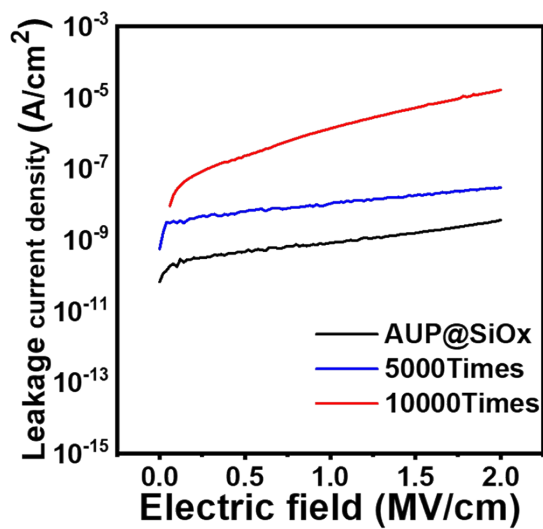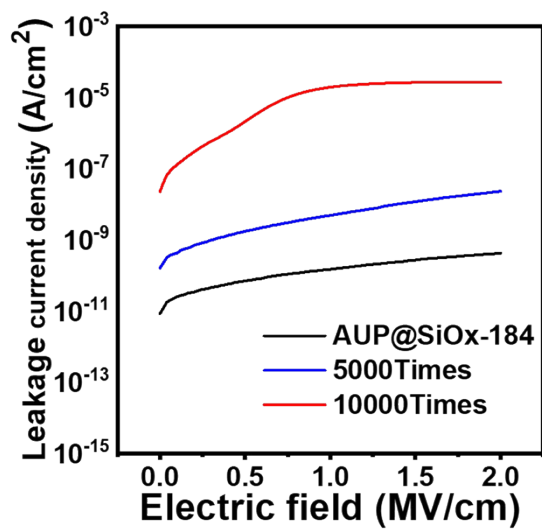

1

2 **Fig S16.** Leakage current stability under folding of AUP@SiOx and AUP@SiOx-184 MIM

3 dielectric layers.

4

AUP@SiOx

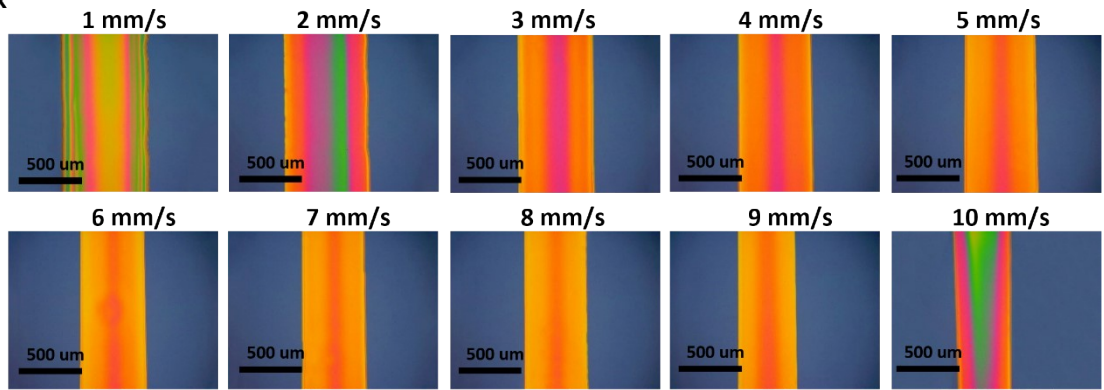

AUP@SiOx-184

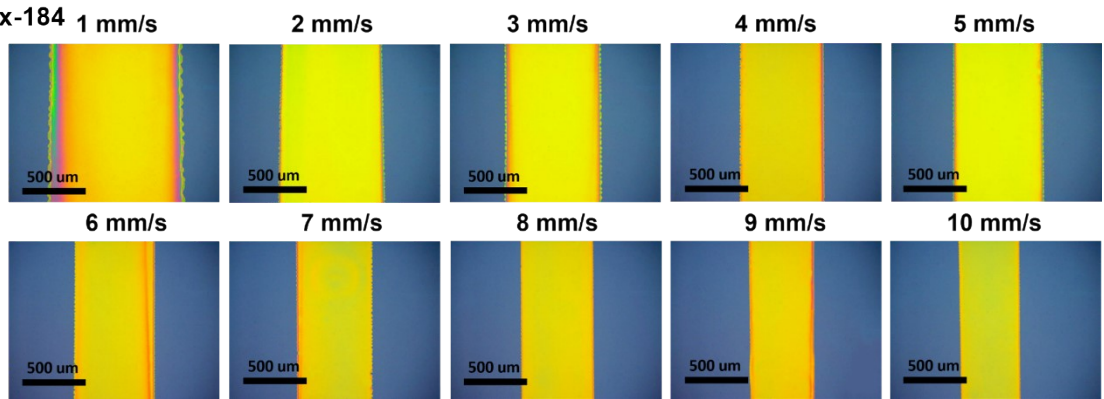

1

2 **Fig. S17.** EHD printed AUP@SiOx and AUP@SiOx-184 dielectric films at different printing

3 speeds.

4

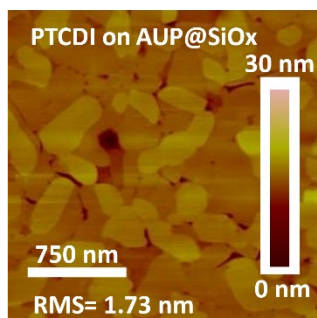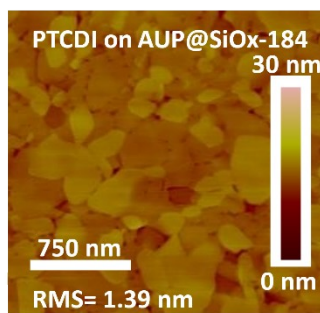

1

2 **Fig. S18.** AFM image for AUP@SiOx dielectric film (b) and AUP@SiOx dielectric film (e)

3 with 50-nm-thick PTCDI-C<sub>8</sub>.

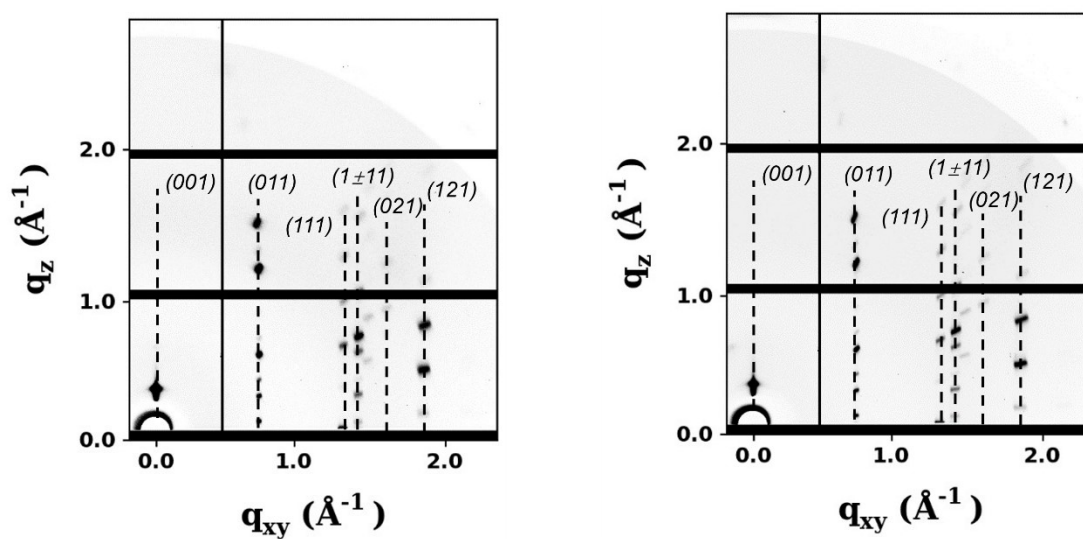

4

5 **Fig. S19.** The corresponding 2D-GIXD images of PTCDI-C<sub>8</sub>

6

7



## AUP@SiOx

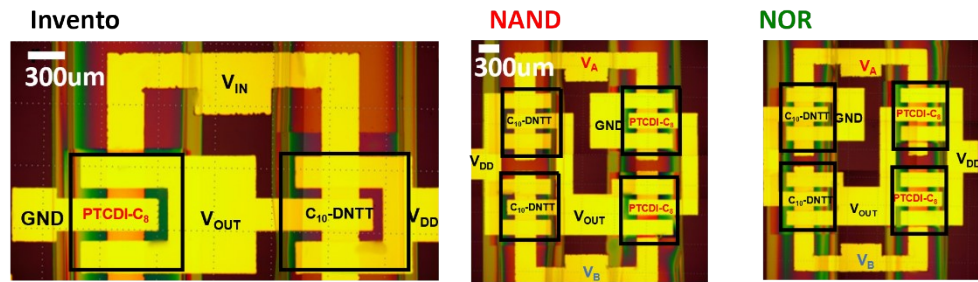

## AUP@SiOx-184

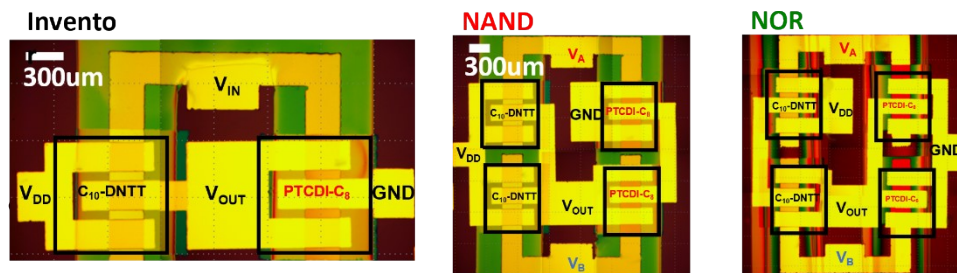

1

2 **Fig. S20.** OM image of NOT, NAND and NOR gates with  $C_{10}$ -DNTT and PTCDI- $C_8$  active

3 layers with AUP@SiOx and AUP@SiOx-184 dielectric layers on the  $\text{SiO}_2$  wafer has been

4 prepared.

5

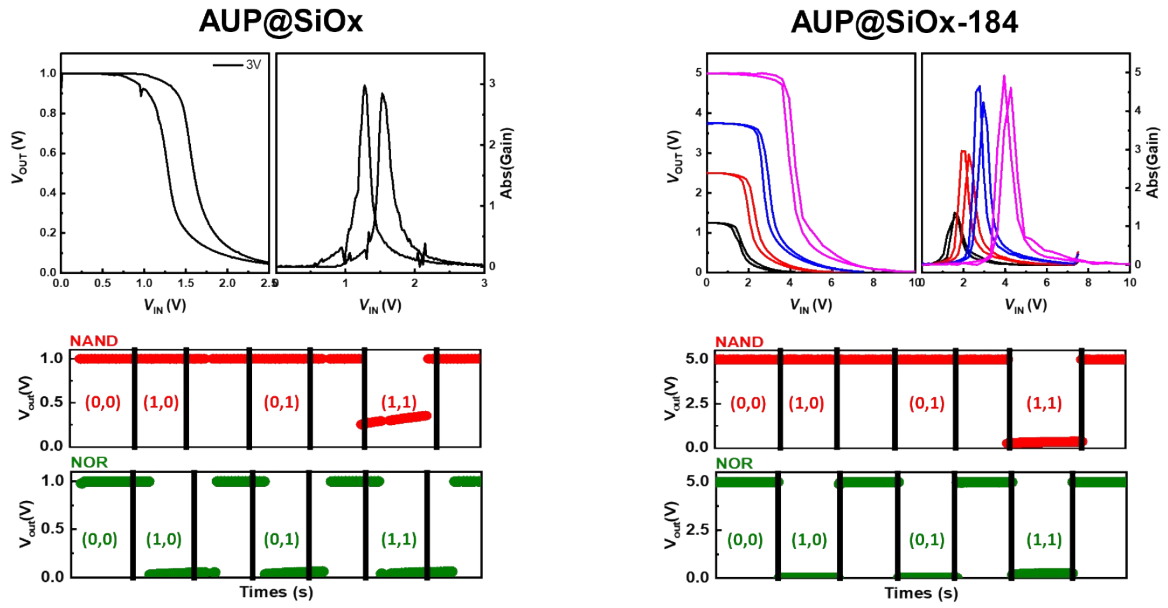

1

2 **Fig. S21.** NOT, NAND, and NOR logic gates printed by EHD, using AUP@SiOx for the  
 3 dielectric layer (left) and AUP@SiOx-184 for the dielectric layer (right).

4

## AUP@SiO<sub>x</sub>-184 PET

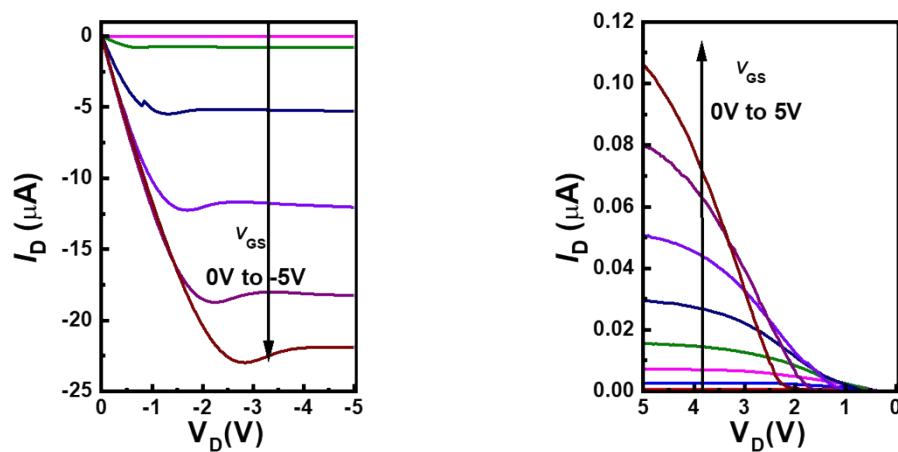

1

2 **Fig. S22.** Output characteristics of OTFTs prepared using EHD printing at PET films.

3
